# Supplementary material for: A Drosophila Model Reveals the Potential Role for mtt in Retinal Disease
Source: MDPI journal article supplement (doi:10.3390/ijms25020899), 2024-01-11
Supplement: s1 [file s1]

[illegible]

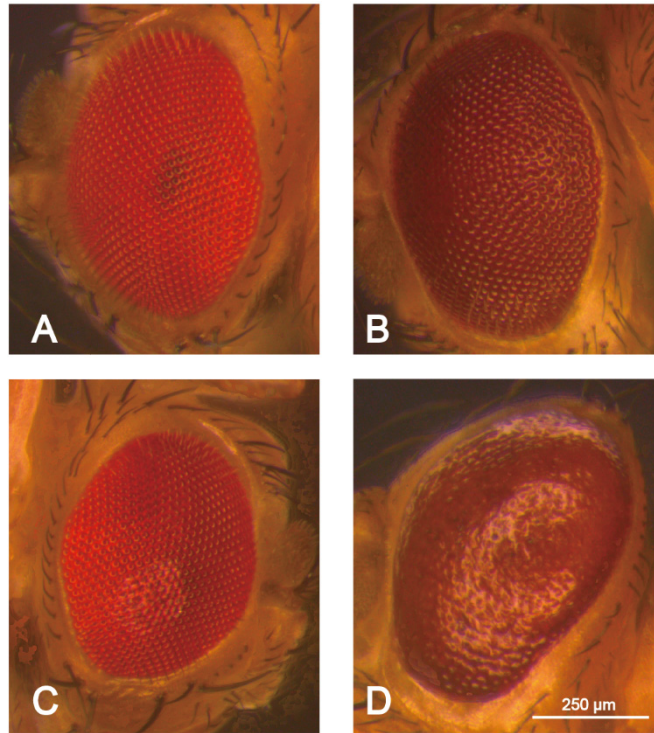

**Figure S2.** Images captured under a stereomicroscope depicting the eyes of *Drosophila* with various genotypes. (A) GMR-Gal4>*mGluR*-RNAi-1 (#THU2115). (B) GMR-Gal4>*mGluR*-RNAi-2 (#THU5288). (C) GMR>*mtt*-RNAi-2 (#THU0827). (D) GMR>*mtt*-RNAi-1 (#THU5594).
